# Supplementary material
Source: HighWire-hosted journal article supplement (https://www.genetics.org/content/suppl/2009/01/19/genetics.108.097238)
Supplement: genetics.108.097238-3.pdf [file genetics.108.097238-3.pdf]

**SUPPLEMENTARY TABLE 3.** —Uniform priors used for Approximate Bayesian simulation<sup>a</sup>.

| parameter           | <i>mays</i> | <i>mexicana</i> | <i>luxurians</i> |
|---------------------|-------------|-----------------|------------------|
| $\tau_D$            | 0-0.2       | 0-0.5           | 0-1              |
| $\tau_S, \tau_A$    | 0- $\tau_D$ | 0- $\tau_D$     | 0- $\tau_D$      |
| $\theta_2/\theta_1$ | 0-1         | 0-5             | 0-1              |
| $\theta_A/\theta_1$ | 1-1         | 0-2             | 0-2              |
| $M_1, M_2$          | 0-10        | 0-10            | 0-4              |

<sup>a</sup>Note that priors for  $\tau_A$  and  $\tau_S$  are uniform for individual simulations, but because they depend on  $\tau_D$  their distribution across simulations is non-uniform.
